# Supplementary material for: Novel and nano-rare genetic causes of paediatric-onset motor neuronopathies
Source: PubMed Central journal article supplement (PMC10808011; doi:10.1093/braincomms/fcae003), 2024-01-05
Supplement: fcae003_supplementary_data.pdf [file fcae003_supplementary_data.pdf]

**Supplementary Table 1: Detailed phenotypical and genetic features of paediatric-onset motor neuropathies.**

|                                            | <b>GEMIN5</b><br><i>Kour et al, 2021<sup>1</sup></i> | <b>EXOSC9</b><br><i>Burns et al, 2018<sup>2</sup></i><br><i>Bizzari et al, 2019<sup>3</sup></i><br><i>Sakamoto et al, 2021<sup>4</sup></i><br><i>Dabaj et al, 2022<sup>5</sup></i> | <b>RBM7</b><br><i>Giunta et al, 2016<sup>6</sup></i> | <b>TRIP4</b><br><i>Knierim et al, 2016<sup>7</sup></i><br><i>Töpf et al, 2021<sup>8</sup></i> | <b>ASCCI</b><br><i>Knierim et al, 2016<sup>7</sup></i><br><i>Giuffrida et al, 2020<sup>9</sup></i><br><i>Lu et al, 2020<sup>10</sup></i><br><i>Rosano et al, 2021<sup>11</sup></i> | <b>ADPRHL2</b><br><i>Bejler et al 2021<sup>12</sup></i>                               | <b>NRCAM</b><br><i>Kurolap et al, 2022<sup>13</sup></i><br><i>Elahi et al, 2023<sup>14</sup></i> | <b>MME</b><br><i>Hong et al, 2019<sup>15</sup></i>         | <b>UBE3C</b><br><i>Gopinath et al, 2007<sup>16</sup></i>            | <b>SLC5A6</b><br><i>Holling et al, 2022<sup>17</sup></i>                         | <b>SLC25A21</b><br><i>Boczonadi et al, 2018<sup>18</sup></i> | <b>BANFI</b><br><i>Marcelot et al, 2023<sup>19</sup></i>                                  | <b>NAGLU</b><br><i>Lopergolo et al, 2023<sup>20</sup></i>              |
|--------------------------------------------|------------------------------------------------------|------------------------------------------------------------------------------------------------------------------------------------------------------------------------------------|------------------------------------------------------|-----------------------------------------------------------------------------------------------|------------------------------------------------------------------------------------------------------------------------------------------------------------------------------------|---------------------------------------------------------------------------------------|--------------------------------------------------------------------------------------------------|------------------------------------------------------------|---------------------------------------------------------------------|----------------------------------------------------------------------------------|--------------------------------------------------------------|-------------------------------------------------------------------------------------------|------------------------------------------------------------------------|
| <b>Number of cases</b>                     | >10 from different families                          | 10 from different families                                                                                                                                                         | 1                                                    | 6 from 4 families <sup>c</sup>                                                                | 5 from 4 families <sup>c</sup>                                                                                                                                                     | 3 <sup>a, b</sup>                                                                     | 2 <sup>b</sup>                                                                                   | 1 <sup>a</sup>                                             | 9 from single family                                                | 5 from 3 families                                                                | 1                                                            | 1                                                                                         | 1                                                                      |
| <b>Age at onset of neuropathy symptoms</b> | Birth – 1 <sup>st</sup> decade                       | Birth – 3 years                                                                                                                                                                    | 1 month                                              | Birth                                                                                         | Birth                                                                                                                                                                              | 2 <sup>nd</sup> decade <sup>a</sup>                                                   | 2 <sup>nd</sup> decade                                                                           | 16 years <sup>a</sup>                                      | 3 – 40 years                                                        | 1 <sup>st</sup> – 2 <sup>nd</sup> decade                                         | 3 years                                                      | 3 years                                                                                   | 2 years and 6 months                                                   |
| <b>Initial symptoms</b>                    | Developmental delay ± hypotonia                      | Developmental delay ± hypotonia                                                                                                                                                    | Hypotonia, poor sucking, failure to thrive           | Arthro-gryposis multiplex congenita, congenital fractures and neonatal respiratory distress   | Arthro-gryposis multiplex congenita, congenital fractures and neonatal respiratory distress                                                                                        | Walking instability, ± fatigue ± atrophy of intrinsic hand muscles distal lower limbs | Distal lower limb weakness                                                                       | Lower limb weakness                                        | Walking and running difficulties due to lower limb weakness         | Fine motor difficulties ± slow walking                                           | Deteriorated walking, frequent falls                         | Abnormal and clumsy gait                                                                  | Weakness in upper and lower limbs                                      |
| <b>Muscle strength</b>                     | Generalized weakness                                 | Proximal and distal weakness (1 year)                                                                                                                                              | Generalized weakness                                 | Generalized weakness, hypotonia                                                               | Generalized weakness, hypotonia                                                                                                                                                    | Distal predominant generalized weakness                                               | Distal or distal-predominant weakness                                                            | Distal and lower extremity predominant weakness (24 years) | Distal (predominantly in upper extremities) or generalized weakness | Weakness and atrophy in hands, foot drop, proximal muscles are normal (19 years) | Distal weakness                                              | Diffuse muscle weakness that affected legs more than arms, a complete foot drop (8 years) | Widespread weakness, Atrophy of distal parts of extremities (60 years) |
| <b>Pyramidal signs</b>                     | Hyperreflexia                                        | -                                                                                                                                                                                  | -                                                    | -                                                                                             | -                                                                                                                                                                                  | ± (spasticity)                                                                        | -                                                                                                | -                                                          | Rarely (Brisk reflexes, Babinski sign)                              | Brisk reflexes, Achilles clonus                                                  | Brisk reflexes, Achilles clonus                              | -                                                                                         | -                                                                      |
| <b>Sensory signs</b>                       | NA                                                   | -                                                                                                                                                                                  | -                                                    | NA                                                                                            | NA                                                                                                                                                                                 | Hypoesthesia in tip toes, diminished position, and vibration                          | -                                                                                                | -                                                          | -                                                                   | -                                                                                | -                                                            | Slightly decreased cold sensation of toes                                                 | Paresthesia, thermal and painful hypoesthesia in limbs                 |

|                                         | <b>GEMIN5</b><br><i>Kour et al, 2021<sup>1</sup></i>                                                      | <b>EXOSC9</b><br><i>Burns et al, 2018<sup>2</sup></i>                                                            | <b>RBM7</b><br><i>Giunta et al, 2016<sup>6</sup></i> | <b>TRIP4</b><br><i>Knierim et al, 2016<sup>7</sup></i><br><i>Töpf et al, 2021<sup>8</sup></i> | <b>ASCC1</b><br><i>Knierim et al, 2016<sup>7</sup></i><br><i>Giuffrida et al, 2020<sup>9</sup></i><br><i>Lu et al, 2020<sup>10</sup></i><br><i>Rosano et al, 2021<sup>11</sup></i> | <b>ADPRHL2</b><br><i>Bejer et al 2021<sup>12</sup></i>                                                                    | <b>NRCAM</b><br><i>Kurolap et al, 2022<sup>13</sup></i><br><i>Elahi et al, 2023<sup>14</sup></i> | <b>MME</b><br><i>Hong et al, 2019<sup>5</sup></i> | <b>UBE3C</b><br><i>Gopinath et al, 2007<sup>16</sup></i> | <b>SLC5A6</b><br><i>Holling et al, 2022<sup>17</sup></i> | <b>SLC25A21</b><br><i>Boczonadi et al, 2018<sup>18</sup></i> | <b>BANFI</b><br><i>Marcelot et al, 2023<sup>19</sup></i> | <b>NAGLU</b><br><i>Lopergolo et al, 2023<sup>20</sup></i> |
|-----------------------------------------|-----------------------------------------------------------------------------------------------------------|------------------------------------------------------------------------------------------------------------------|------------------------------------------------------|-----------------------------------------------------------------------------------------------|------------------------------------------------------------------------------------------------------------------------------------------------------------------------------------|---------------------------------------------------------------------------------------------------------------------------|--------------------------------------------------------------------------------------------------|---------------------------------------------------|----------------------------------------------------------|----------------------------------------------------------|--------------------------------------------------------------|----------------------------------------------------------|-----------------------------------------------------------|
|                                         |                                                                                                           |                                                                                                                  |                                                      |                                                                                               |                                                                                                                                                                                    | sense in lower legs and hands                                                                                             |                                                                                                  |                                                   |                                                          |                                                          |                                                              |                                                          |                                                           |
| <b>Additional neurological features</b> | Tremor ± ID ± head nodding ± ataxia ± epilepsy ± microcephaly ± respiratory distress ± oculomotor apraxia | Seizures ± psychomotor regression ± tongue fasciculation ± respiratory insufficiency ± nystagmus                 | Respiratory difficulties                             | May result in stillbirth                                                                      | May result in stillbirth                                                                                                                                                           | ID ± seizures ± nystagmus ± postural tremor ± restrictive pulmonary function                                              | -                                                                                                | Postural tremor                                   | -                                                        | Tremor ± cerebellar signs                                | Mild facial weakness, tongue fasciculations, decreased FVC   | Swallowing and respiratory difficulties                  | -                                                         |
| <b>Skeletal deformities</b>             | CMA ± claw hands                                                                                          | CMA ± joint contractures ± valgus deformities                                                                    | -                                                    | CMA ± multiple fractures                                                                      | CMA ± multiple fractures ± talipes equinovarus ± joint contractures                                                                                                                | Pes cavus ± scoliosis                                                                                                     | Pes cavus ± hammer toes ± scoliosis ± hyperlordosis ± claw hands                                 | Pes cavus ± joint contractures                    | Pes cavus ± hammer toes                                  | -                                                        | Claw hands, scoliosis                                        | Scoliosis                                                | -                                                         |
| <b>Systemic features</b>                | High-arched narrow palate                                                                                 | Facial dysmorphism ± short stature ± bone fractures ± microcephalia ± failure to thrive ± strabismus ± esotropia | Cachexia                                             | Pleural effusion and chylothorax, biliary calculi and soft tissue emphysema                   | Tent-shaped mouth, microretrognathia, polyhydramnios, cardiomyopathy, reduced prenatal movements                                                                                   | Growth retardation ± left ventricle hypertrophy ± mitral insufficiency ± micrognathia ± hyperhidrosis ± absent trunk hair | Cataracts                                                                                        | -                                                 | -                                                        | Dilated cardiomyopathy ± inguinal hernia                 | Failure to thrive                                            | Poor weight gain                                         | -                                                         |

|                                       |                                                                      |                                                                                                                                                                                    |                                                      |                                                                                               |                                                                                                                                                                                    |                                                         |                                                                                                  |                                                    |                                                                                    |                                                                              |                                                              |                                                                           |                                                           |
|---------------------------------------|----------------------------------------------------------------------|------------------------------------------------------------------------------------------------------------------------------------------------------------------------------------|------------------------------------------------------|-----------------------------------------------------------------------------------------------|------------------------------------------------------------------------------------------------------------------------------------------------------------------------------------|---------------------------------------------------------|--------------------------------------------------------------------------------------------------|----------------------------------------------------|------------------------------------------------------------------------------------|------------------------------------------------------------------------------|--------------------------------------------------------------|---------------------------------------------------------------------------|-----------------------------------------------------------|
|                                       | <b>GEMIN5</b><br><i>Kour et al, 2021<sup>1</sup></i>                 | <b>EXOSC9</b><br><i>Burns et al, 2018<sup>2</sup></i><br><i>Bizzari et al, 2019<sup>3</sup></i><br><i>Sakamoto et al, 2021<sup>4</sup></i><br><i>Dabaj et al, 2022<sup>5</sup></i> | <b>RBM7</b><br><i>Giunta et al, 2016<sup>6</sup></i> | <b>TRIP4</b><br><i>Knierim et al, 2016<sup>7</sup></i><br><i>Töpf et al, 2021<sup>8</sup></i> | <b>ASCC1</b><br><i>Knierim et al, 2016<sup>7</sup></i><br><i>Giuffrida et al, 2020<sup>9</sup></i><br><i>Lu et al, 2020<sup>10</sup></i><br><i>Rosano et al, 2021<sup>11</sup></i> | <b>ADPRHL2</b><br><i>Beijer et al 2021<sup>12</sup></i> | <b>NRCAM</b><br><i>Kurolap et al, 2022<sup>13</sup></i><br><i>Elahi et al, 2023<sup>14</sup></i> | <b>MME</b><br><i>Hong et al, 2019<sup>15</sup></i> | <b>UBE3C</b><br><i>Gopinath et al, 2007<sup>16</sup></i>                           | <b>SLC5A6</b><br><i>Holling et al, 2022<sup>17</sup></i>                     | <b>SLC25A21</b><br><i>Boczonadi et al, 2018<sup>18</sup></i> | <b>BANFI</b><br><i>Marcelot et al, 2023<sup>19</sup></i>                  | <b>NAGLU</b><br><i>Lopergolo et al, 2023<sup>20</sup></i> |
| <b>Disease course</b>                 | Static or progressive course                                         | Progressive (3 patients died during the follow-up between 1.5 and 10 years)                                                                                                        | Progressive (Died due to respiratory decompensation) | Progressive (lethal in first 2 years), later onset myopathy cases are described               | Progressive (lethal in first 2 years), later onset myopathy cases are described                                                                                                    | Progressive                                             | NA                                                                                               | NA                                                 | NA                                                                                 | Progressive                                                                  | Progressive course, unable to stand at 18 years              | Progressive (Wheelchair use at 10 years)                                  | Slowly progressive                                        |
| <b>EMG / Nerve conduction studies</b> | Severe neurogenic pattern, motor neuropathy ± SN ± myopathic pattern | Motor neuronopathy                                                                                                                                                                 | Low CMAPs with chronic early and late re-innervation | NA                                                                                            | NA                                                                                                                                                                                 | Axonal motor polyneuropathy ± mild SN                   | Segmental neurogenic involvement in L1-S2 and C8-D1, and myopathic motor unit potentials ± SN    | Length-dependent motor neuropathy                  | Slowed tibial conduction in the older patients (range 37–50 m/s) with normal CMAPs | Motor neuropathy ± neuronopathy ±, mixed demyelinating and axonal neuropathy | Severe neurogenic changes                                    | Neurogenic process with diffuse fibrillations and reduced motor responses | Bilateral chronic motor denervation on C7-T1 myotomes     |
| <b>Cranial MRI</b>                    | Cerebellar or ponto-cerebellar atrophy ± white matter changes        | Cerebellar atrophy ± cerebral atrophy ± white matter atrophy                                                                                                                       | Normal                                               | Hypoplastic cerebellum, necrosis, haemorrhage of occipital cortex                             | Abnormal cortical gyration, lateral ventricle dilatation, simplified gyral pattern of the frontal lobes and enlargement of the external CSF spaces                                 | Normal or mild white matter hyper-intensity lesions     | Normal or arachnoid cyst of the posterior fossa                                                  | NA                                                 | Normal                                                                             | NA                                                                           | Normal                                                       | NA                                                                        | NA                                                        |
| <b>Nerve biopsy</b>                   | NA                                                                   | NA                                                                                                                                                                                 | NA                                                   | Normal myelination but with loss of unmyelinate                                               | NA                                                                                                                                                                                 | NA                                                      | NA                                                                                               | NA                                                 | Chronic axonal neuropathy                                                          | Normal                                                                       | Axonopathy with mild and patchy loss of                      | NA                                                                        | NA                                                        |

|                                                              |                                                |                                                                                                                                                                                    |                                                                       |                                                                                                       |                                                                                                                                                            |                                                                                           |                                                                                      |                                              |                                                                  |                                                           |                                                                                                                                |                                                    |                                                            |
|--------------------------------------------------------------|------------------------------------------------|------------------------------------------------------------------------------------------------------------------------------------------------------------------------------------|-----------------------------------------------------------------------|-------------------------------------------------------------------------------------------------------|------------------------------------------------------------------------------------------------------------------------------------------------------------|-------------------------------------------------------------------------------------------|--------------------------------------------------------------------------------------|----------------------------------------------|------------------------------------------------------------------|-----------------------------------------------------------|--------------------------------------------------------------------------------------------------------------------------------|----------------------------------------------------|------------------------------------------------------------|
|                                                              | <b>GEMIN5</b><br>Kour et al, 2021 <sup>1</sup> | <b>EXOSC9</b><br>Burns et al, 2018 <sup>2</sup><br><b>Bizzari et al, 2019<sup>3</sup></b><br>Sakamoto et al, 2021 <sup>4</sup><br>Dabaj et al, 2022 <sup>5</sup>                   | <b>RBM7</b><br>Giunta et al, 2016 <sup>6</sup>                        | <b>TRIP4</b><br>Knierim et al, 2016 <sup>7</sup><br>Töpf et al, 2021 <sup>8</sup>                     | <b>ASCC1</b><br>Knierim et al, 2016 <sup>7</sup><br>Giuffrida et al, 2020 <sup>9</sup><br>Lu et al, 2020 <sup>10</sup><br>Rosano et al, 2021 <sup>11</sup> | <b>ADPRHL2</b><br>Beijer et al 2021 <sup>12</sup>                                         | <b>NRCAM</b><br>Kurolop et al, 2022 <sup>13</sup><br>Elahi et al, 2023 <sup>14</sup> | <b>MME</b><br>Hong et al, 2019 <sup>15</sup> | <b>UBE3C</b><br>Gopinath et al, 2007 <sup>16</sup>               | <b>SLC5A6</b><br>Holling et al, 2022 <sup>17</sup>        | <b>SLC25A21</b><br>Boczonadi et al, 2018 <sup>18</sup>                                                                         | <b>BANFI</b><br>Marcelot et al, 2023 <sup>19</sup> | <b>NAGLU</b><br>Lopergolo et al, 2023 <sup>20</sup>        |
|                                                              |                                                |                                                                                                                                                                                    |                                                                       | d axons as documented by “empty” pouches                                                              |                                                                                                                                                            |                                                                                           |                                                                                      |                                              |                                                                  |                                                           | myelinated fibres                                                                                                              |                                                    |                                                            |
| <b>Other investigations</b>                                  | Abnormal EEG                                   | Pronounced streak-like and mixed increase in echogenicity with widespread evidence of active fasciculations in muscle ultrasound<br>Denervation signs in muscle biopsy, normal EEG | Fibre type grouping of small and hypertrophic fibres in muscle biopsy | Reduced fiber size, increased fiber-size variation, clustered type I fibers, atrophy in muscle biopsy | Fiber size variation and atrophy, type I fiber grouping, oxidative rims, type I fiber predominance in muscle biopsies                                      | Intermittent bifrontal theta waves ± fronto-central sporadic epileptiform activity in EEG | Elevated creatine kinase                                                             | NA                                           | -                                                                | Low serum biotin, muscle biopsy showed neurogenic pattern | Microcytic anemia, lactic aciduria, increased urinary 3-hydroxyisovaleric and glutaric acids, Marginally increased CSF lactate | NA                                                 | 20% reduced urinary alpha-N-acetylglucosaminidase activity |
| <b>Overlapping disorder</b>                                  | PCH                                            | PCDID                                                                                                                                                                              | -                                                                     | Congenital myopathy                                                                                   | Congenital myopathy                                                                                                                                        | CONSDIAS, PAMP Syndrome                                                                   | NDD with neuro-muscular and skeletal abnormalities                                   | CMT2T, SCA43?                                | NDD with absent speech and movement and behavioral abnormalities | SMVTD                                                     | -                                                                                                                              | Nestor-Guillermo progeria syndrome                 | CMT2V, MPS3B                                               |
| <b>Zygoty and variants with motor neuronopathy phenotype</b> | Hom H923P, Hom H913R, Hom D704E,               | Hom L14P, CH L14P and R161*, CH L80R and R162Lfs*3                                                                                                                                 | Hom P79R                                                              | Hom, R254*, Hom R278*, CH R254* and R278*                                                             | Hom E53Gfs19*, CH S311* and deletion of exon 5, CH R343* and 10q22.1                                                                                       | Hom V335G, Hom G77T                                                                       | Hom S134P, Hom Q25*                                                                  | CH V440_K472 del and, P676L                  | CSV                                                              | Hom S429G, CH R94* and Y162C                              | Hom L232R                                                                                                                      | Het G16R                                           | Het A479T                                                  |

|                                                                                                                        |                                                    |                                                   |                                                                                         |                                                                                                                                                                        |                                                      |                                                                                            |                                                 |                                                       |                                                       |                                                           |                                                       |                                                        |
|------------------------------------------------------------------------------------------------------------------------|----------------------------------------------------|---------------------------------------------------|-----------------------------------------------------------------------------------------|------------------------------------------------------------------------------------------------------------------------------------------------------------------------|------------------------------------------------------|--------------------------------------------------------------------------------------------|-------------------------------------------------|-------------------------------------------------------|-------------------------------------------------------|-----------------------------------------------------------|-------------------------------------------------------|--------------------------------------------------------|
| <b>GEMIN5</b><br>Kour et al,<br>2021 <sup>1</sup>                                                                      | <b>EXOSC9</b><br>Burns et al,<br>2018 <sup>2</sup> | <b>RBM7</b><br>Giunta et al,<br>2016 <sup>6</sup> | <b>TRIP4</b><br>Knierim et al,<br>2016 <sup>7</sup><br>Töpf et al,<br>2021 <sup>8</sup> | <b>ASCC1</b><br>Knierim et al,<br>2016 <sup>7</sup><br>Giuffrida et<br>al, 2020 <sup>9</sup><br>Lu et al,<br>2020 <sup>10</sup><br>Rosano et al,<br>2021 <sup>11</sup> | <b>ADPRHL2</b><br>Beijer et al<br>2021 <sup>12</sup> | <b>NRCAM</b><br>Kurolap et al,<br>2022 <sup>13</sup><br>Elahi et al,<br>2023 <sup>14</sup> | <b>MME</b><br>Hong et al,<br>2019 <sup>15</sup> | <b>UBE3C</b><br>Gopinath et<br>al, 2007 <sup>16</sup> | <b>SLC5A6</b><br>Holling et al,<br>2022 <sup>17</sup> | <b>SLC25A21</b><br>Boczonadi et<br>al, 2018 <sup>18</sup> | <b>BANFI</b><br>Marcelot et<br>al, 2023 <sup>19</sup> | <b>NAGLU</b><br>Lopergolo et<br>al, 2023 <sup>20</sup> |
| Hom<br>G683D,<br>Hom<br>S1000P,<br>CH I988F<br>and L1367P,<br>CH I988F<br>and<br>S1311Lfs*7,<br>CH H162R<br>and L1367P | Hom G51R,<br>CH L14P<br>and<br>R212*               |                                                   |                                                                                         | micro-<br>deletion,<br>CH<br>Arg156* and<br>c.297-8<br>T>G                                                                                                             |                                                      |                                                                                            |                                                 |                                                       |                                                       |                                                           |                                                       |                                                        |

**Abbreviations:** CH: Compound heterozygous; CMA: Congenital multiplex arthrogyrosis; CMAP: Compound muscle action potential; CMT: Charcot Marie Tooth disease; CONSDIAS: Stress-induced childhood-onset neurodegeneration with variable ataxia and seizures syndrome; CSF: Cerebrospinal fluid; CSV: Complex structural variant; EEG: Electroencephalography; EMG: Electromyography; FVC: Forced vital capacity; Het: Heterozygous; Hom: Homozygous; ID: Intellectual disability; MPS: Mucopolysaccharidosis; MRI: Magnetic resonance imaging; NA: Not applicable; NDD: Neurodevelopmental disorder; PAMP: Episodic psychosis, ataxia, motor neuropathy with pyramidal signs; PCH: Pontocerebellar hypoplasia; SCA: Spinocerebellar ataxia; SN: Sensory neuropathy; SMVTD: Sodium-dependent multivitamin transporter deficiency

<sup>a</sup>: Later-onset cases are excluded

<sup>b</sup>: Cases with neuropathy as a part of complex disease spectrum are excluded

<sup>c</sup>: Cases described as congenital myopathy are excluded

## References

1. Kour S, Rajan DS, Fortuna TR, *et al.* Loss of function mutations in GEMIN5 cause a neurodevelopmental disorder. *Nat Commun.* May 7 2021;12(1):2558. doi:10.1038/s41467-021-22627-w
2. Burns DT, Donkervoort S, Muller JS, *et al.* Variants in EXOSC9 Disrupt the RNA Exosome and Result in Cerebellar Atrophy with Spinal Motor Neuronopathy. *Am J Hum Genet.* May 3 2018;102(5):858-873. doi:10.1016/j.ajhg.2018.03.011
3. Bizzari S, Hamzeh AR, Mohamed M, Al-Ali MT, Bastaki F. Expanded PCH1D phenotype linked to EXOSC9 mutation. *Eur J Med Genet.* Jan 2020;63(1):103622. doi:10.1016/j.ejmg.2019.01.012
4. Sakamoto M, Iwama K, Sekiguchi F, *et al.* Novel EXOSC9 variants cause pontocerebellar hypoplasia type 1D with spinal motor neuronopathy and cerebellar atrophy. *J Hum Genet.* Apr 2021;66(4):401-407. doi:10.1038/s10038-020-00853-2
5. Dabaj I, Hassani A, Burglen L, *et al.* Pontocerebellar Hypoplasia Type 1D: A Case Report and Comprehensive Literature Review. *J Clin Med.* Jul 26 2022;11(15)doi:10.3390/jcm11154335
6. Giunta M, Edvardson S, Xu Y, *et al.* Altered RNA metabolism due to a homozygous RBM7 mutation in a patient with spinal motor neuropathy. *Hum Mol Genet.* Jul 15 2016;25(14):2985-2996. doi:10.1093/hmg/ddw149
7. Knierim E, Hirata H, Wolf NI, *et al.* Mutations in Subunits of the Activating Signal Cointegrator 1 Complex Are Associated with Prenatal Spinal Muscular Atrophy and Congenital Bone Fractures. *Am J Hum Genet.* Mar 3 2016;98(3):473-489. doi:10.1016/j.ajhg.2016.01.006
8. Topf A, Pyle A, Griffin H, *et al.* Exome reanalysis and proteomic profiling identified TRIP4 as a novel cause of cerebellar hypoplasia and spinal muscular atrophy (PCH1). *Eur J Hum Genet.* Sep 2021;29(9):1348-1353. doi:10.1038/s41431-021-00851-8
9. Giuffrida P, Arpa G, Vanoli A, Di Sabatino A. Comment on Jun, S.Y.; *et al.* "Tumor Budding and Poorly Differentiated Clusters in Small Intestinal Adenocarcinoma" *Cancers* 2020, 12, 2199. *Cancers (Basel).* Oct 15 2020;12(10)doi:10.3390/cancers12102982
10. Lu W, Liang M, Su J, *et al.* Novel compound heterozygous pathogenic variants in ASCC1 in a Chinese patient with spinal muscular atrophy with congenital bone fractures 2 : Evidence supporting a "Definitive" gene-disease relationship. *Mol Genet Genomic Med.* May 2020;8(5):e1212. doi:10.1002/mgg3.1212
11. Rosano KK, Wegner DJ, Shinawi M, *et al.* Biallelic ASCC1 variants including a novel intronic variant result in expanded phenotypic spectrum of spinal muscular atrophy with congenital bone fractures 2 (SMABF2). *Am J Med Genet A.* Jul 2021;185(7):2190-2197. doi:10.1002/ajmg.a.62219
12. Beijer D, Agnew T, Rack JGM, *et al.* Biallelic ADPRHL2 mutations in complex neuropathy affect ADP ribosylation and DNA damage response. *Life Sci Alliance.* Nov 2021;4(11)doi:10.26508/lsa.202101057
13. Kurolap A, Kreuder F, Gonzaga-Jauregui C, *et al.* Bi-allelic variants in neuronal cell adhesion molecule cause a neurodevelopmental disorder characterized by developmental delay, hypotonia, neuropathy/spasticity. *Am J Hum Genet.* Mar 3 2022;109(3):518-532. doi:10.1016/j.ajhg.2022.01.004
14. Elahi Z, Soveyzi M, Nafissi S, *et al.* Bi-allelic loss of function variant in the NRCAM gene is associated with motor-predominant axonal polyneuropathy; the second report. *Mol Genet Genomic Med.* Apr 2023;11(4):e2131. doi:10.1002/mgg3.2131

15. Hong D, Fang P, Yao S, *et al.* Variants in MME are associated with autosomal-recessive distal hereditary motor neuropathy. *Ann Clin Transl Neurol.* Sep 2019;6(9):1728-1738. doi:10.1002/acn3.50868
16. Gopinath S, Blair IP, Kennerson ML, Durnall JC, Nicholson GA. A novel locus for distal motor neuron degeneration maps to chromosome 7q34-q36. *Hum Genet.* Jun 2007;121(5):559-64. doi:10.1007/s00439-007-0348-9
17. Holling T, Nampoothiri S, Tarhan B, *et al.* Novel biallelic variants expand the SLC5A6-related phenotypic spectrum. *Eur J Hum Genet.* Apr 2022;30(4):439-449. doi:10.1038/s41431-021-01033-2
18. Boczonadi V, King MS, Smith AC, *et al.* Mitochondrial oxodicarboxylate carrier deficiency is associated with mitochondrial DNA depletion and spinal muscular atrophy-like disease. *Genet Med.* Oct 2018;20(10):1224-1235. doi:10.1038/gim.2017.251
19. Marcelot A, Rodriguez-Tirado F, Cuniasse P, *et al.* A De Novo Sequence Variant in Barrier-to-Autointegration Factor Is Associated with Dominant Motor Neuronopathy. *Cells.* Mar 9 2023;12(6)doi:10.3390/cells12060847
20. Lopergolo D, Salvatore S, Sorrentino V, Malandrini A, Santorelli FM, Battisti C. Early-onset motor polyneuropathy associated with a novel dominant NAGLU mutation. *Neurol Sci.* Apr 2023;44(4):1415-1418. doi:10.1007/s10072-023-06607-0
